# Supplementary material
Source: PubMed Central journal article supplement (PMC4404168)
Supplement: NIHMS642726-supplement-supplement_1.pdf [file NIHMS642726-supplement-supplement_1.pdf]

## SUPPLEMENTARY APPENDIX

### Contents

|                                                                                                  |        |
|--------------------------------------------------------------------------------------------------|--------|
| 1. Text: Supplementary materials and methods                                                     | P.2-3  |
| Histology, bacterial culture and antibiotic susceptibility test                                  | P.2    |
| <sup>13</sup> C-urea breath test                                                                 | P.2-3  |
| Genotyping of CYP2C19 and IL-1 $\beta$ -511                                                      | P.3    |
| 2. References                                                                                    | P.4    |
| 3. Supplementary Figure 1                                                                        | P.5-6  |
| Consort flow charts for (A) first-line treatment and (B) rescue treatment                        |        |
| 4. Supplementary Figure 2                                                                        | p.7    |
| Anti- <i>H. pylori</i> regimens that had been prescribed in the rescue population                |        |
| 5. Supplementary Table 1                                                                         | P.8-12 |
| Univariate analysis of other factors that may influence <i>H. pylori</i> eradication             |        |
| 6. Supplementary Table 2                                                                         | P.13   |
| Prevalence of antibiotic none-resistance and co-resistance in the first-line and rescue regimens |        |

## **SUPPLEMENTARY MATERIALS AND METHODS**

### **Histology, Bacterial culture and antibiotic susceptibility test**

During each endoscopic examination, a total of six biopsy specimens were obtained (three from the antrum and three from the body). Two of the three pairs of specimens were processed with hematoxylin and eosin and Giemsa staining. Histological parameters were graded by the pathologist blinded to the treatment protocol according to the updated Sydney system.<sup>1</sup>

Another pair of samples were homogenized and streaked onto an agar plate with selective medium.<sup>2</sup> The plates were incubated at 37°C under micro-aerophilic conditions (5% O<sub>2</sub>, 10% CO<sub>2</sub>, 85% N<sub>2</sub>) for 3-7 days. *H. pylori* was identified by its characteristic biotyping. The primary isolates were subcultured and the colonies were harvested in 2-2.5 mL of BHI broth. The final inoculum was adjusted to give an opacity equivalent to a McFarland turbidity standard of 3 (approximately 10<sup>9</sup> cfu/mL). A 0.2-mL aliquot of suspension was swabbed on the agar plate with nonselective medium. The E-test strips (AB Biodisk, Solna, Sweden) were used for susceptibility testing.

### **<sup>13</sup>C-urea breath test**

The procedure of <sup>13</sup>C-urea breath test was modified from a previously described method.<sup>2</sup> A baseline sample of expired breath in a 20 mL vacutainer from each patient

was obtained before the administration of 100 mg of <sup>13</sup>C-urea (99% pure; Isotech, Irvine, CA) in 50 ml of distilled water. Thirty minutes after the ingestion of <sup>13</sup>C-urea, the expired breath was collected. All samples were taken in duplicated and analyzed by an automated breath <sup>13</sup>C analyzer (Analytical Precision Limited, Cheshire, England). A result of more than 5 units was considered a positive breath test.

### **Genotyping of CYP2C19 and IL-1β-511**

Human genomic DNA was extracted from peripheral leukocytes of blood samples using methods described previously.<sup>3</sup> The DNA samples were stored at -80°C until use.

Genetic polymorphism of the *CYP2C19*\*2 (*CYP2C19 m1*) and *CYP2C19*\*3 (*CYP2C19 m2*) alleles and *IL-1β-511* C/C, C/T, T/T alleles were identified by polymerase chain reaction-based restriction fragment length polymorphism (PCR-RFLP) as described previously.<sup>4-6</sup> Patients were identified as EM (homozygous extensive metabolizers; *CYP2C19* \*1/\*1); IM (heterozygous extensive metabolizers; *CYP2C19* \*1/\*2 or \*1/\*3) or PM (poor metabolizers; *CYP2C19* \*2/\*2, \*2/\*3 or \*3/\*3) according to *CYP2C19* genotypes.

## REFERENCES

1. Dixon MF, Genta RM, Yardley JH, Correa P. Classification and grading of gastritis. The updated Sydney System. International Workshop on the Histopathology of Gastritis, Houston 1994. *Am J Surg Pathol* 1996;20:1161-81.
2. Yang JC, Yang KC, Hsu CT, Wang CS, Kuo CF, Wang TH. A multicenter study on eradication of *Helicobacter pylori* infection in patients with duodenal ulcer by lansoprazole-antibiotics combined therapy. *J Microbiol Immunol Infect* 1999;32:1-8.
3. Lin CJ, Yang JC, Uang YS, Chern HD, Wang TH. Time-dependent amplified pharmacokinetic and pharmacodynamic responses of rabeprazole in cytochrome P450 2C19 poor metabolizers. *Pharmacotherapy* 2003;23:711-9.
4. de Morais SM, Wilkinson GR, Blaisdell J, Meyer UA, Nakamura K, Goldstein JA. Identification of a new genetic defect responsible for the polymorphism of (S)-mephenytoin metabolism in Japanese. *Mol Pharmacol* 1994;46:594-8.
5. de Morais SM, Wilkinson GR, Blaisdell J, Nakamura K, Meyer UA, Goldstein JA. The major genetic defect responsible for the polymorphism of S-mephenytoin metabolism in humans. *J Biol Chem* 1994;269:15419-22.
6. di Giovine FS, Takhsh E, Blakemore AI, Duff GW. Single base polymorphism at -511 in the human interleukin-1 $\beta$  gene (IL 1 $\beta$ ). *Hum Mol Genet* 1992;1:450.

Supplementary Figure 1A.

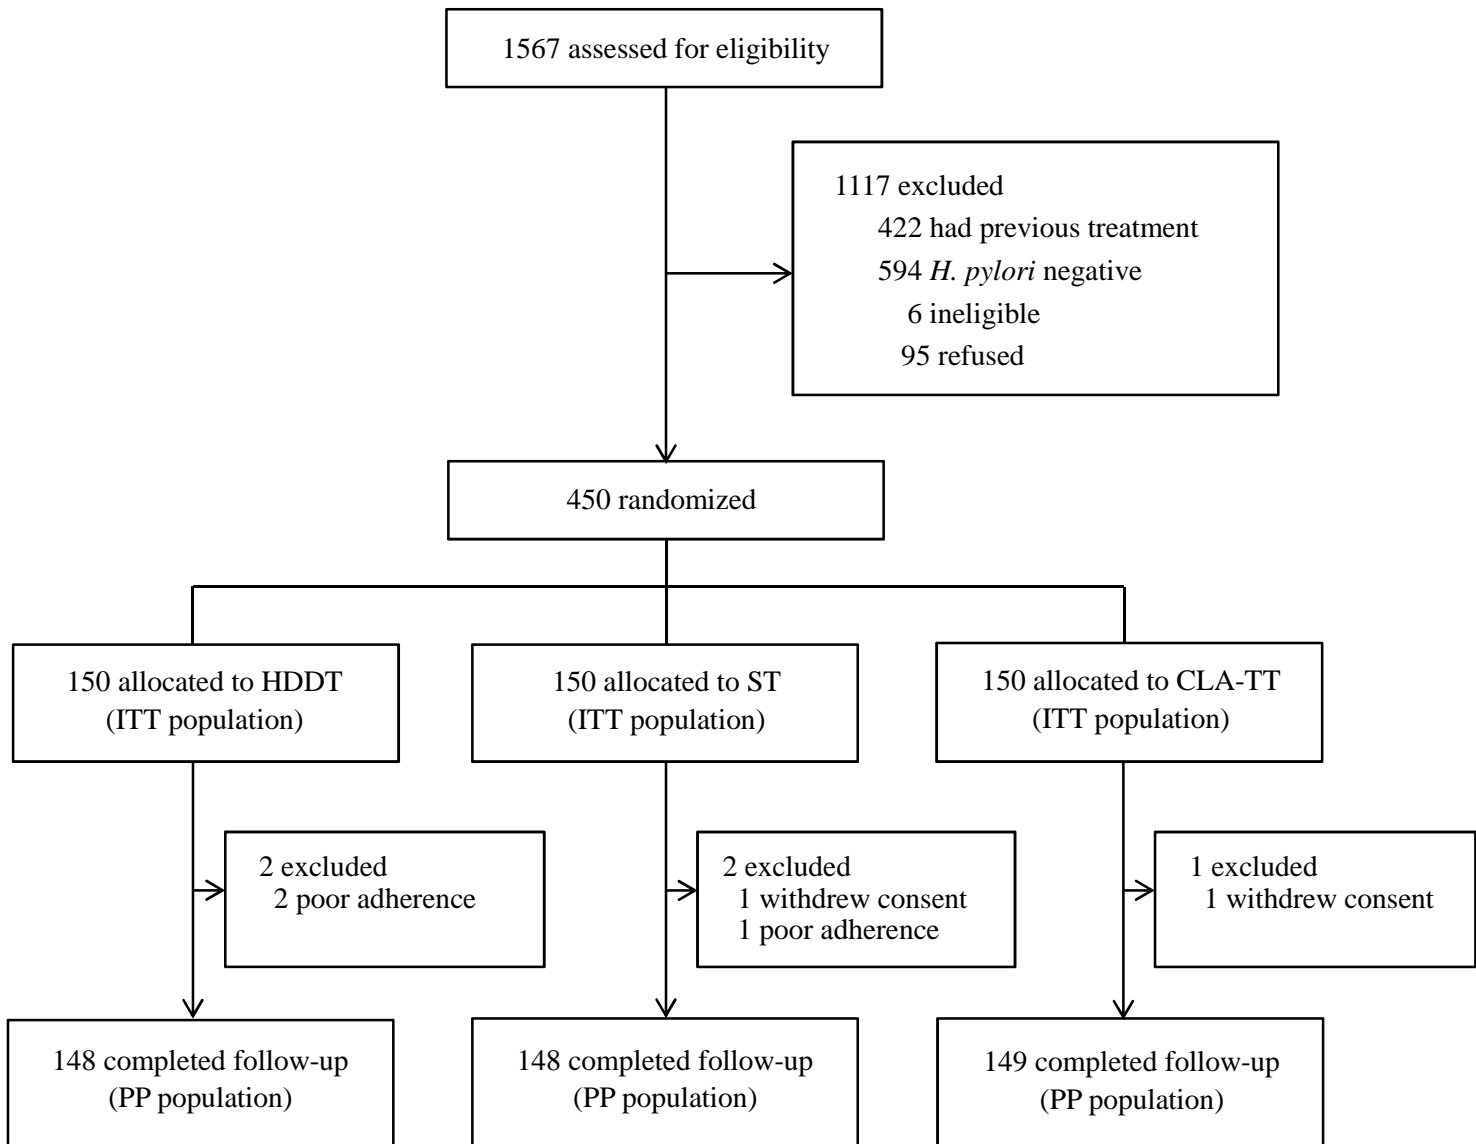

**Supplementary Figure 1B.**

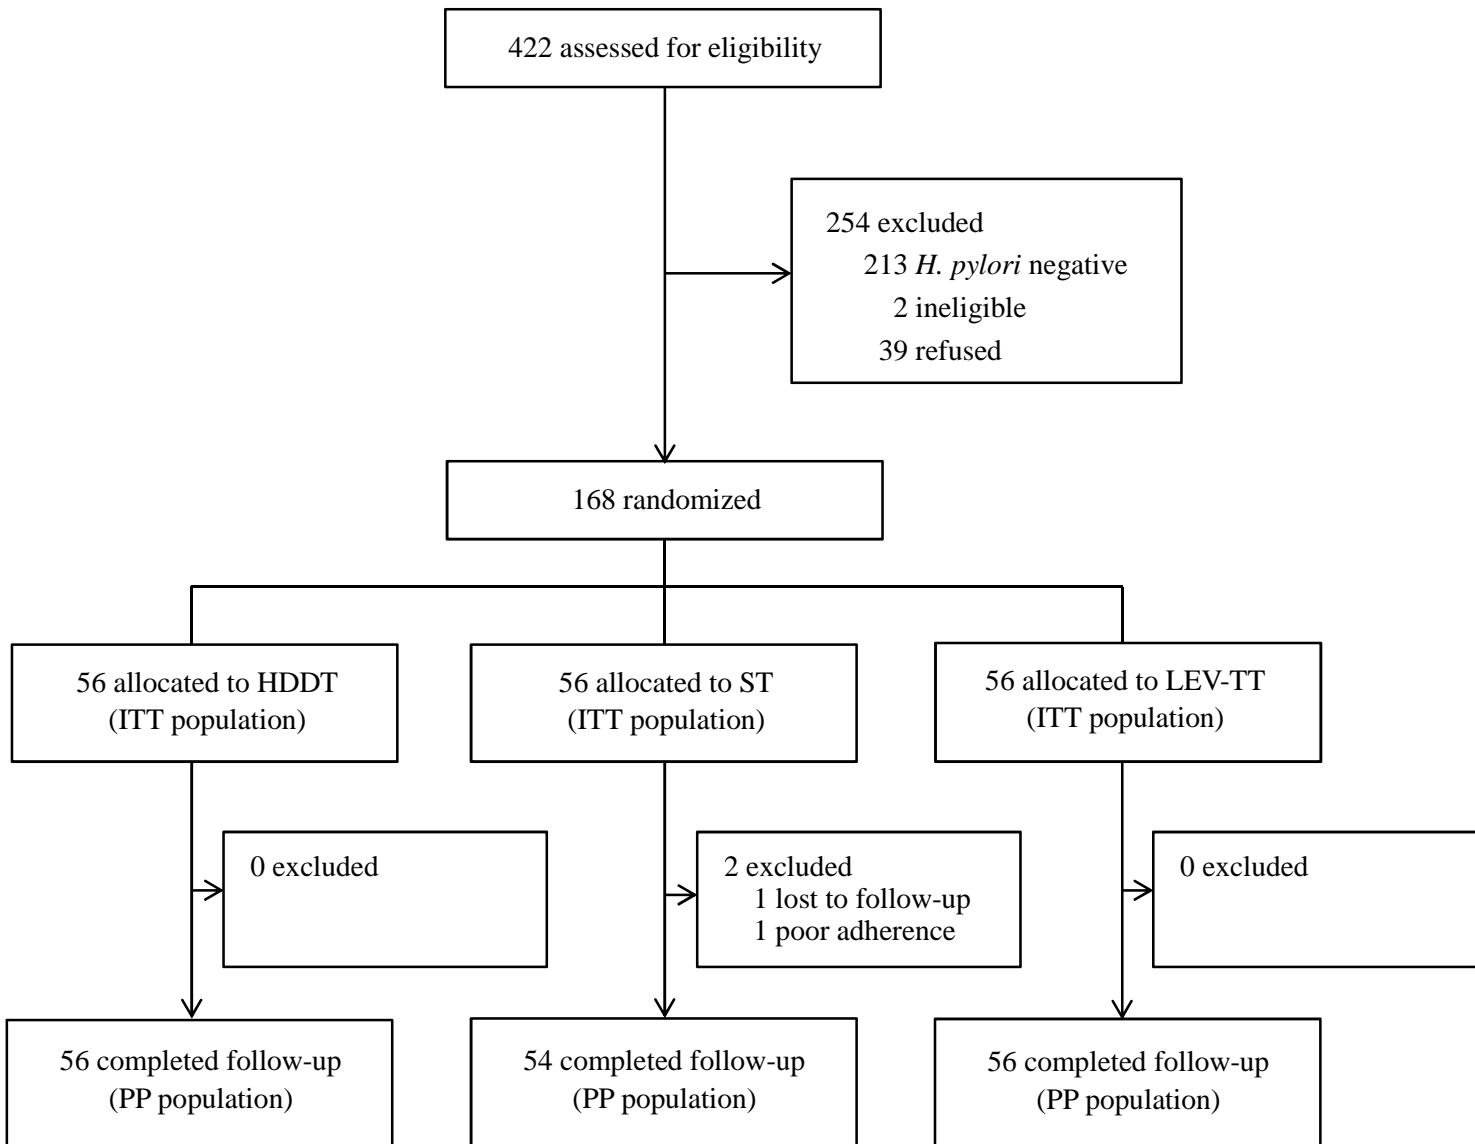

**Supplementary Figure 1. Consort flow charts for (A) first-line treatment and (B) rescue**

**treatment.** HDDT: high-dose dual therapy; ST: sequential therapy; CLA-TT:

Clarithromycin-containing triple therapy; LEV-TT: Levofloxacin-containing triple therapy; ITT:

intention-to-treat; PP: per-protocol.

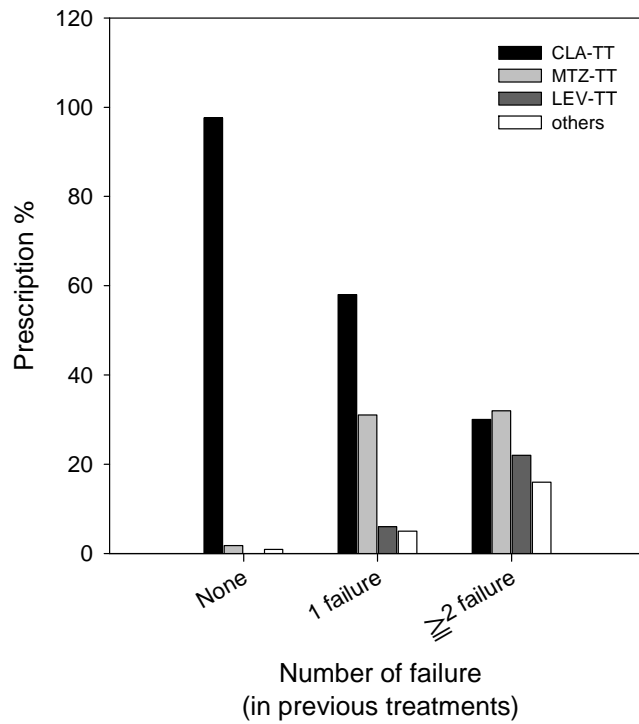

**Supplementary Figure 2.** Anti-*H. pylori* regimens that had been prescribed in the rescue population according to the number of treatment failure. CLA-TT: Clarithromycin-based triple therapy; MTZ-TT: Metronidazole-based triple therapy; LEV-TT: Levofloxacin-based triple therapy.

**Supplementary Table 1.** Univariate analysis of other factors (in addition to factors

reported in Table 4 and Table 5) that may influence *H. pylori*

eradication in first-line and rescue regimens

| <b>First-line regimens</b> | <b>ODT group</b> | <b>ST group</b> | <b>CLA-TT group</b> |
|----------------------------|------------------|-----------------|---------------------|
| BMI, kg/m <sup>2</sup>     |                  |                 |                     |
| Not eradicated             | 25.4±3.5(7)      | 24.2±4.3(22)    | 23.7±3.6(29)        |
| eradicated                 | 23.7±3.5(143)    | 24.1±3.5(128)   | 23.7±3.6(121)       |
| P-value                    | 0.197            | 0.860           | 0.975               |
| IL-1β-511 genotype         |                  |                 |                     |
| C/C                        | 95.2 (40/42)     | 81.6 (31/38)    | 80.6 (29/36)        |
| C/T                        | 97.4 (75/77)     | 91.4 (74/81)    | 79.8 (75/94)        |
| T/T                        | 96.4 (27/28)     | 79.3 (23/28)    | 89.5 (17/19)        |
| P-value                    | 0.839            | 0.165           | 0.652               |
| Bacterial density          |                  |                 |                     |
| Mild                       | 93.3 (42/45)     | 88.1 (37/42)    | 70.5 (31/44)        |
| Moderate                   | 98.0 (48/49)     | 88.0 (44/50)    | 85.0 (51/60)        |
| Severe                     | 98.1 (53/54)     | 83.9 (47/56)    | 86.7 (39/45)        |
| P-value                    | 0.444            | 0.829           | 0.092               |
| Sex                        |                  |                 |                     |



|                      |                |                |                |
|----------------------|----------------|----------------|----------------|
| Male                 | 97.1 (67/69)   | 89.7 (52/58)   | 79.7 (47/59)   |
| Female               | 96.2 (76/79)   | 84.4 (76/90)   | 82.2 (74/90)   |
| P-value              | 1              | 0.487          | 0.831          |
| Regular Alcohol use  |                |                |                |
| Yes                  | 95.5 (21/22)   | 95.2 (12/13)   | 90.0 (18/20)   |
| No                   | 96.8 (120/124) | 86.5 (115/133) | 79.5 (101/127) |
| P-value              | 1              | 0.7            | 0.367          |
| Smoking              |                |                |                |
| Yes                  | 97.1 (33/34)   | 90.3 (28/31)   | 86.1 (31/36)   |
| No                   | 96.0 (95/99)   | 86.4 (89/103)  | 79.4 (81/102)  |
| P-value              | 1              | 0.761          | 0.463          |
| Good adherence       |                |                |                |
| Yes                  | 96.5 (136/141) | 88.4 (122/138) | 82.8 (120/145) |
| No                   | 100.0 (6/6)    | 100.0 (2/2)    | 50.0 (1/2)     |
| P-value              | 1              | 1              | 0.323          |
| Peptic ulcer disease |                |                |                |
| Yes                  | 95.1 (98/103)  | 85.7(84/98)    | 82.0 (82/100)  |
| No                   | 95.1 (45/47)   | 84.6 (44/52)   | 78.0 (39/50)   |
| P-value              | 1              | 1              | 0.661          |

| <b>Rescue regimens</b>       | <b>ODT group</b> | <b>ST group</b> | <b>LEV-TT group</b> |
|------------------------------|------------------|-----------------|---------------------|
| <b>BMI, kg/m<sup>2</sup></b> |                  |                 |                     |
| Not eradicated               | 25.2±4.3(6)      | 23.9±4.0(27)    | 24.7±4.8(12)        |
| eradicated                   | 24.0±3.3(50)     | 23.6±5.0(29)    | 23.9±3.7(44)        |
| P-value                      | 0.440            | 0.866           | 0.458               |
| <b>IL-1β-511 genotype</b>    |                  |                 |                     |
| C/C                          | 94.4 (17/18)     | 58.3 (7/12)     | 76.9 (10/13)        |
| C/T                          | 84.6 (22/26)     | 51.6 (16/31)    | 82.1 (23/28)        |
| T/T                          | 91.7 (11/12)     | 54.5 (6/11)     | 73.3 (11/15)        |
| P-value                      | 0.559            | 0.933           | 0.912               |
| <b>Bacterial density</b>     |                  |                 |                     |
| Mild                         | 84.0 (21/25)     | 43.5 (10/23)    | 87.0 (20/23)        |
| Moderate                     | 93.3 (14/15)     | 66.7 (8/12)     | 81.0 (17/21)        |
| Severe                       | 93.8 (15/16)     | 61.1 (11/18)    | 58.3 (7/12)         |
| P-value                      | 0.637            | 0.356           | 0.163               |
| <b>Sex</b>                   |                  |                 |                     |
| Male                         | 91.3 (21/23)     | 60.0 (12/20)    | 95.2 (20/21)        |
| Female                       | 87.9 (29/33)     | 50.0 (17/34)    | 68.6 (24/35)        |

|                     |               |               |               |
|---------------------|---------------|---------------|---------------|
| P-value             | 1             | 0.576         | 0.040         |
| Regular Alcohol use |               |               |               |
| Yes                 | 75.0 (6/8)    | 80.0 (4/5)    | 83.8 (5/6)    |
| No                  | 91.7 (44/48)  | 50.0 (24/48)  | 78.0 (39/50)  |
| P-value             | 0.2           | 0.355         | 1             |
| Smoking             |               |               |               |
| Yes                 | 90.9 (10/11)  | 75.0 (9/12)   | 85.7 (12/14)  |
| No                  | 88.4 (38/43)  | 47.6 (20/42)  | 76.2 (32/42)  |
| P-value             | 1             | 0.113         | 0.709         |
| Good adherence      |               |               |               |
| Yes                 | 88.5 (46/52)  | 56.9 (29/51)  | 77.4 (41/53)  |
| No                  | 100.0 (2/2)   | 0.0 (0/2)     | -             |
| P-value             | 1             | 0.2           | -             |
| Age, years          |               |               |               |
| Not eradicated      | 57.0±9.9(6)   | 56.4±11.8(27) | 53.3±14.1(12) |
| eradicated          | 52.7±12.6(50) | 55.2±13.0(29) | 49.7±12.8(44) |
| P-value             | 0.425         | 0.720         | 0.402         |

---

Data are % (n/N); ODT: optimized dual therapy; ST: sequential therapy; CLA-TT:

clarithromycin-based triple therapy; LEV-TT: levofloxacin-based triple therapy; BMI:

body mass index; good adherence: took at least 80% of drugs.

**Supplementary Table 2.** Prevalence of antibiotic none-resistance and co-resistance in the first-line and rescue regimens

| None-resistance or<br>co-resistance | First-line<br>(N=450) | Rescue<br>(N=167) | P-value |
|-------------------------------------|-----------------------|-------------------|---------|
| None                                | 49.8 (224)            | 9.0 (15)          | <0.001  |
| CLA/MTZ                             | 8.0 (36)              | 43.7 (73)         | <0.001  |
| CLA/LEV                             | 5.8 (26)              | 19.2 (32)         | <0.001  |
| MTZ/LEV                             | 6.9 (31)              | 14.4 (24)         | 0.005   |
| AMO/CLA                             | 0.0 (0)               | 3.0 (5)           | 0.001   |
| CLA/MTZ/LEV                         | 2.9 (13)              | 13.2 (22)         | <0.001  |
| AMO/CLA/MTZ                         | 0.0 (0)               | 2.4 (4)           | 0.005   |
| AMO/CLA/MTZ/LEV                     | 0.0 (0)               | 1.8 (3)           | 0.020   |

Data are % (n); AMO: amoxicillin; CLA: clarithromycin; MTZ: metronidazole; LEV: levofloxacin.

**CONSORT Flow Diagram**  
**Supplementary Figure 1 A**

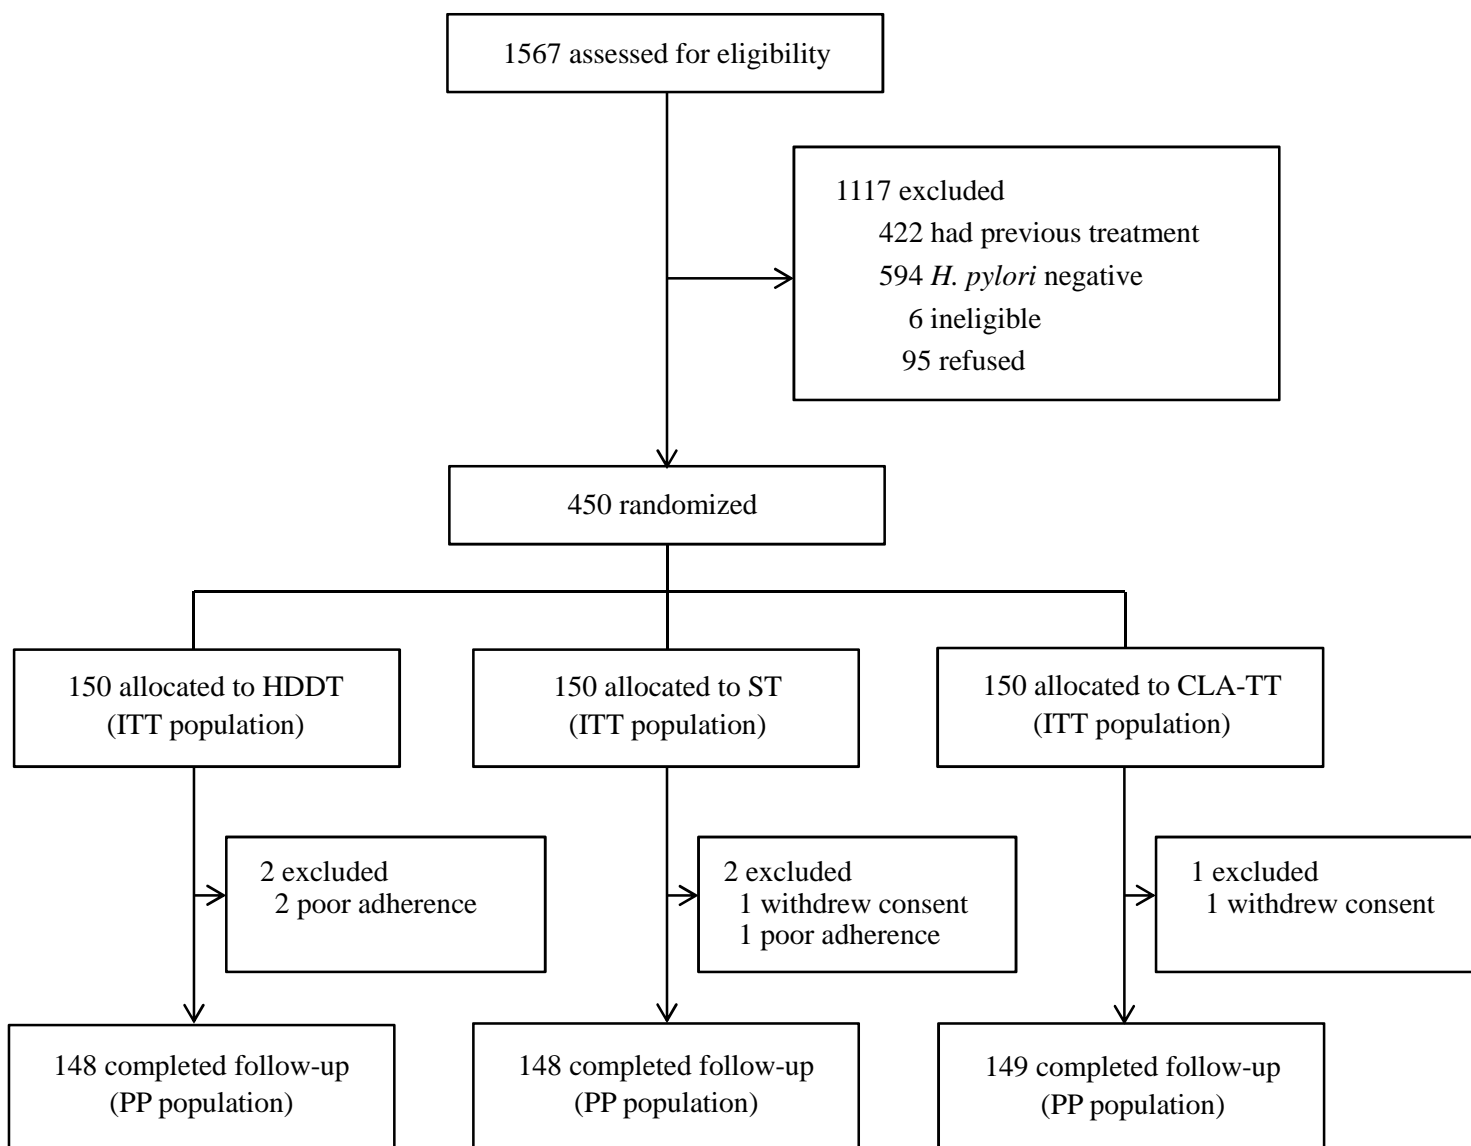

**Supplementary Figure 1 B**

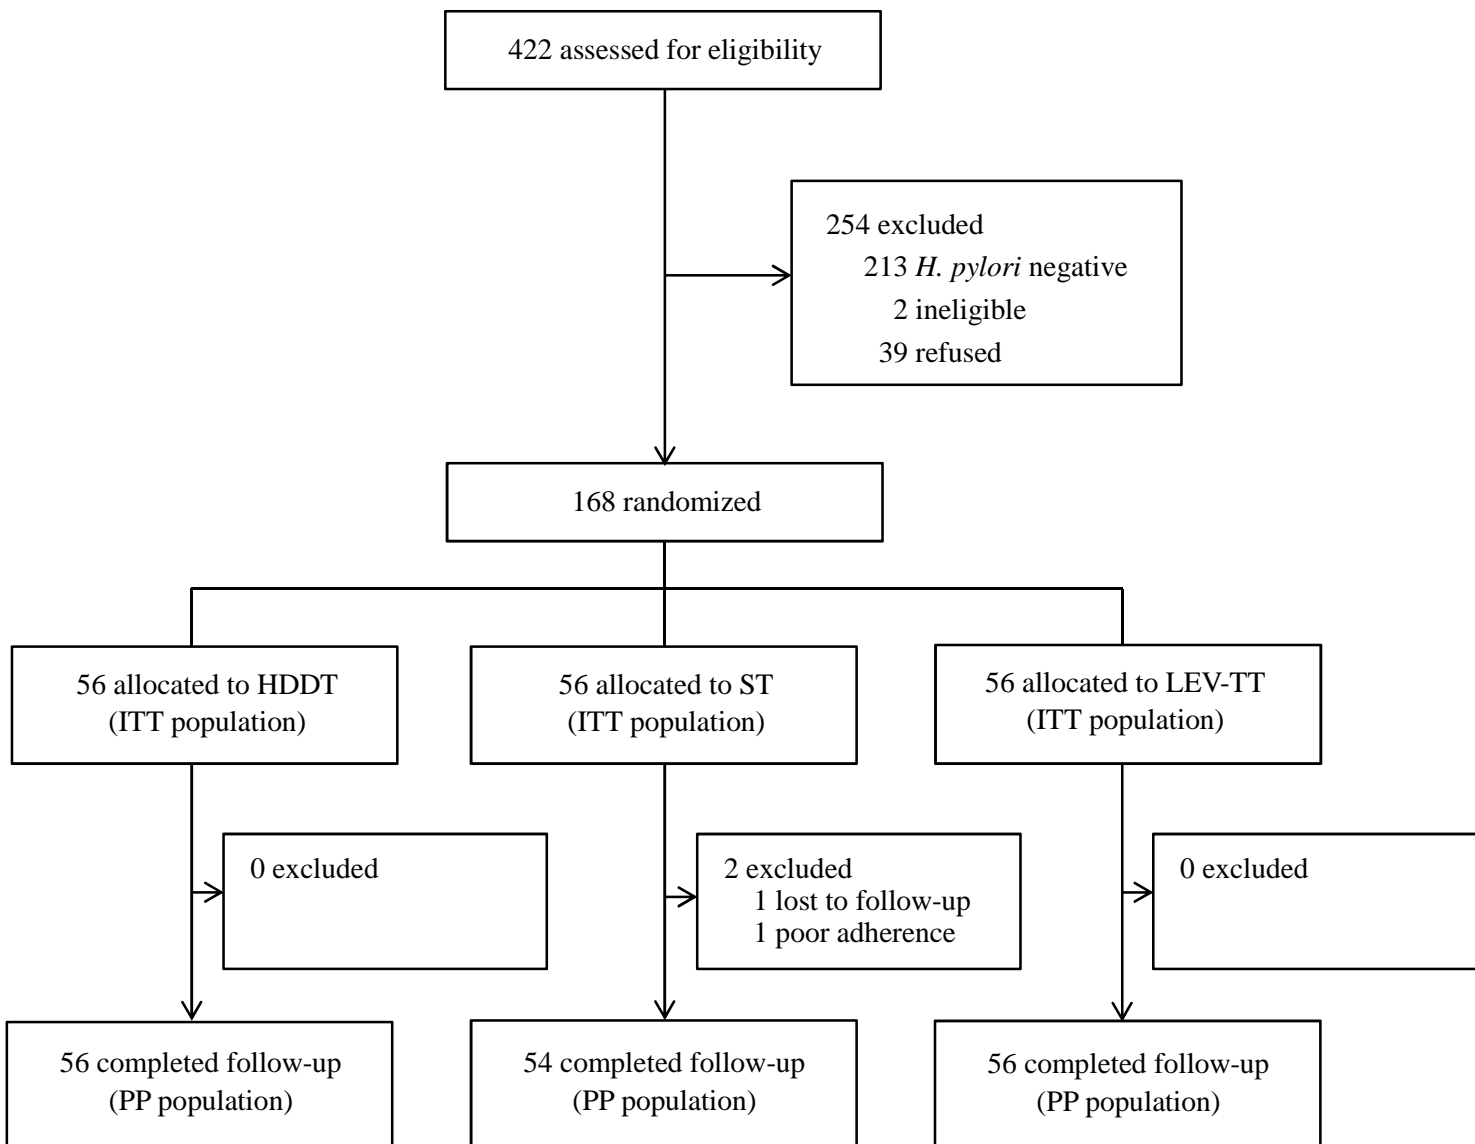

**Supplementary Figure 1. Consort flow charts for (A) first-line treatment and (B) rescue**

**treatment.** HDDT: high-dose dual therapy; ST: sequential therapy; CLA-TT:

Clarithromycin-containing triple therapy; LEV-TT: Levofloxacin-containing triple therapy; ITT:

intention-to-treat; PP: per-protocol.
